# Supplementary material
Source: PubMed Central journal article supplement (PMC3408240)
Supplement: Supp_Data.pdf [file Supp_Data.pdf]

## Supplementary Data

SUPPLEMENTARY TABLE S1. INTERNATIONAL CLASSIFICATION OF DISEASES, 9TH REVISION-CLINICAL MODIFICATION (ICD-9-CM) AND MAYO CLINIC ADAPTATION OF THE HOSPITAL ADAPTATION OF THE INTERNATIONAL CLASSIFICATION OF DISEASES (H-ICDA) CODES USED IN THE STUDY

| <i>Mayo adapted<br/>HICD-A</i> | <i>Code description</i>                           |
|--------------------------------|---------------------------------------------------|
| 02985000                       | PSYCHOSIS, ACUTE, WITH TRAUMA, BRAIN              |
| 02985110                       | PSYCHOSIS, ACUTE, WITH BRAIN TRAUMA               |
| 02985120                       | SYNDROME, AMNESTIC, TRAUMATIC (ACUTE)             |
| 02995000                       | PSYCHOSIS, CHRONIC, WITH BRAIN TRAUMA             |
| 02995110                       | PSYCHOSIS, CHRONIC, WITH TRAUMA, BRAIN            |
| 03042000                       | SYNDROME, ACUTE, BRAIN, WITH TRAUMA               |
| 03042120                       | SYNDROME, POST-CONTUSION, BRAIN NOS               |
| 03042130                       | SYNDROME, FRONTAL LOBE, POST-TRAUMA               |
| 03052000                       | SYNDROME, CHRONIC, BRAIN, WITH TRAUMA             |
| 03052110                       | SYNDROME, BRAIN, ORGANIC, CHRONIC, C BRAIN TRAUMA |
| 03052130                       | SYNDROME, POST-CONTUSION, BRAIN CHRONIC           |
| 04310000                       | HEMORRHAGE, SUBDURAL, NOS                         |
| 04310110                       | HEMORRHAGE, SUBDURAL, NOS                         |
| 04310111                       | HEMATOMA, SUBDURAL, NOS                           |
| 04310120                       | HEMATOMA, EPIDURAL, ACUTE                         |
| 04310130                       | HEMATOMA, EPIDURAL, NOS                           |
| 04310131                       | HEMATOMA, EXTRADURAL, NOS, SEE ALSO EPIDURAL      |
| 04310140                       | HEMATOMA, SUBDURAL, ACUTE                         |
| 04310150                       | HEMATOMA, SUBDURAL, CHRONIC                       |
| 04311000                       | HEMORRHAGE, SUBDURAL, WITH PARALYSIS              |
| 04311110                       | HEMORRHAGE, SUBDURAL, WITH PARALYSIS              |
| 07610810                       | DAMAGE, BRAIN, DUE TO BIRTH INJURY                |
| 07610811                       | INJURY, BIRTH, BRAIN                              |
| 07619510                       | TRAUMA, BIRTH, NEC                                |
| 07700000                       | COMA                                              |
| 07700110                       | COMATOSE                                          |
| 07700111                       | COMA, NOS                                         |
| 07700112                       | UNCONSCIOUS-SEE ALSO DISORDER                     |
| 07700120                       | COMA, NOS, CAUSE SPECIFIED                        |
| 07700130                       | COMA, SPINDLE                                     |
| 07700140                       | VEGETATIVE STATE (CNS)                            |
| 07707110                       | AMNESIA, POST-TRAUMATIC                           |
| 07755110                       | DISORDER, CONSCIOUSNESS, CAUSE SPECIFIED          |
| 07920120                       | HEADACHE, POST TRAUMA                             |
| 08000000                       | FRACTURE, SKULL VAULT, CLOSED                     |
| 08000010                       | FRACTURE, SKULL, VAULT                            |
| 08000020                       | FRACTURE, SKULL, FRONTAL                          |
| 08000030                       | FRACTURE, SKULL, VERTEX                           |
| 08000040                       | FRACTURE, SKULL, PARIETAL                         |
| 08001000                       | FRACTURE, SKULL VAULT, OPEN                       |
| 08001010                       | FRACTURE, SKULL VAULT, OPEN                       |
| 08001020                       | FRACTURE, SKULL, FRONTAL, OPEN                    |
| 08001030                       | FRACTURE, SKULL, VERTEX, OPEN                     |
| 08001040                       | FRACTURE, SKULL, PARIETAL, OPEN                   |
| 08009000                       | FRACTURE, SKULL VAULT, LATE EFFECT                |
| 08009010                       | FRACTURE, SKULL VAULT, LATE EFFECT                |
| 08009020                       | FRACTURE, SKULL, FRONTAL, LATE EFFECT             |
| 08009030                       | FRACTURE, SKULL, VERTEX, LATE EFFECT              |
| 08009040                       | FRACTURE, SKULL, PARIETAL, LATE EFFECT            |
| 08010000                       | FRACTURE, SKULL BASE, CLOSED                      |
| 08010110                       | FRACTURE, SKULL, ANTERIOR FOSSA                   |
| 08010120                       | FRACTURE, SKULL, BASE                             |
| 08010130                       | FRACTURE, SKULL, MIDDLE FOSSA                     |
| 08010140                       | FRACTURE, SKULL, POSTERIOR FOSSA                  |

(continued)

SUPPLEMENTARY TABLE S1. (CONTINUED)

| <i>Mayo adapted<br/>HICD-A</i> | <i>Code description</i>                                   |
|--------------------------------|-----------------------------------------------------------|
| 08010150                       | FRACTURE, SKULL, OCCIPITAL                                |
| 08010160                       | FRACTURE, SKULL, ANTRUM                                   |
| 08010170                       | FRACTURE, SKULL, ETHMOID                                  |
| 08010180                       | FRACTURE, SKULL, SPHENOID                                 |
| 08010190                       | FRACTURE, SKULL, TEMPORAL                                 |
| 08010200                       | FRACTURE, SINUS, CODE ALSO FRACTURE SKULL, PART SPECIFIED |
| 08010210                       | FRACTURE, MALLEUS (EAR)                                   |
| 08011000                       | FRACTURE, SKULL BASE, OPEN                                |
| 08011110                       | FRACTURE, SKULL, ANTERIOR FOSSA, OPEN                     |
| 08011120                       | FRACTURE, SKULL, BASE, OPEN                               |
| 08011121                       | FRACTURE, SKULL, OPEN                                     |
| 08011130                       | FRACTURE, SKULL, MIDDLE FOSSA, OPEN                       |
| 08011140                       | FRACTURE, SKULL, POSTERIOR FOSSA, OPEN                    |
| 08011150                       | FRACTURE, SKULL, OCCIPITAL, OPEN                          |
| 08011160                       | FRACTURE, SKULL, ANTRUM, OPEN                             |
| 08011170                       | FRACTURE, SKULL, ETHMOID, OPEN                            |
| 08011180                       | FRACTURE, SKULL, SPHENOID, OPEN                           |
| 08011190                       | FRACTURE, SKULL, TEMPORAL, OPEN                           |
| 08011210                       | FRACTURE, MALLEUS, OPEN                                   |
| 08019000                       | FRACTURE, SKULL BASE, LATE EFFECT                         |
| 08019110                       | FRACTURE, SKULL, ANTERIOR FOSSA, LATE EFFECT              |
| 08019120                       | FRACTURE, SKULL, BASE, LATE EFFECT                        |
| 08019130                       | FRACTURE, SKULL, MIDDLE FOSSA, LATE EFFECT                |
| 08019140                       | FRACTURE, SKULL, POSTERIOR FOSSA, LATE EFFECT             |
| 08019150                       | FRACTURE, SKULL, OCCIPITAL, LATE EFFECT                   |
| 08019160                       | FRACTURE, SKULL, ANTRUM, LATE EFFECT                      |
| 08019170                       | FRACTURE, SKULL, ETHMOID, LATE EFFECT                     |
| 08019180                       | FRACTURE, SKULL, SPHENOID, LATE EFFECT                    |
| 08019190                       | FRACTURE, SKULL, TEMPORAL, LATE EFFECT                    |
| 08019210                       | FRACTURE, MALLEUS, LATE EFFECT                            |
| 08019220                       | FRACTURE, MALLEUS, OLD                                    |
| 08020000                       | FRACTURE, NASAL, CLOSED                                   |
| 08020110                       | FRACTURE, NOSE                                            |
| 08021000                       | FRACTURE, NASAL, OPEN                                     |
| 08021110                       | FRACTURE, NOSE, OPEN                                      |
| 08022000                       | FRACTURE, MANDIBLE, CLOSED                                |
| 08022110                       | FRACTURE, JAW, LOWER                                      |
| 08022111                       | FRACTURE, MANDIBLE                                        |
| 08022112                       | FRACTURE, MAXILLA, INFERIOR, SEE ALSO FRACTURE, MANDIBLE  |
| 08022210                       | FRACTURE, JAW, NOS                                        |
| 08023000                       | FRACTURE, MANDIBLE, OPEN                                  |
| 08023110                       | FRACTURE, MANDIBLE, OPEN                                  |
| 08023111                       | FRACTURE, JAW, LOWER, OPEN                                |
| 08023210                       | FRACTURE, JAW, NOS, OPEN                                  |
| 08024000                       | FRACTURE, FACIAL BONE, NEC, CLOSED                        |
| 08024110                       | FRACTURE, PALATE                                          |
| 08024120                       | FRACTURE, ORBIT                                           |
| 08024121                       | FRACTURE, ORBIT, BLOWOUT                                  |
| 08024130                       | FRACTURE, JAW, UPPER                                      |
| 08024131                       | FRACTURE, MAXILLA                                         |
| 08024132                       | FRACTURE, MAXILLARY ANTRUM                                |
| 08024133                       | FRACTURE, ANTRUM, MAXILLARY                               |
| 08024134                       | FRACTURE, LA FORTE'S, SEE ALSO FRACTURE MAXILLA           |
| 08024140                       | FRACTURE, MALAR BONE                                      |
| 08024150                       | FRACTURE, FACE BONE                                       |
| 08024151                       | FRACTURE, FACIAL                                          |
| 08024160                       | FRACTURE, ZYGOMA                                          |
| 08025000                       | FRACTURE, FACIAL BONE, NEC, OPEN                          |
| 08025110                       | FRACTURE, PALATE, OPEN                                    |
| 08025120                       | FRACTURE, ORBIT, OPEN                                     |
| 08025130                       | FRACTURE, JAW, UPPER, OPEN                                |

(continued)

SUPPLEMENTARY TABLE S1. (CONTINUED)

| <i>Mayo adapted<br/>HICD-A</i> | <i>Code description</i>                            |
|--------------------------------|----------------------------------------------------|
| 08025131                       | FRACTURE, MAXILLA, OPEN                            |
| 08025132                       | FRACTURE, MAXILLARY ANTRUM, OPEN                   |
| 08025140                       | FRACTURE, MALAR BONE                               |
| 08025150                       | FRACTURE, FACE BONE                                |
| 08025151                       | FRACTURE, FACIAL                                   |
| 08025160                       | FRACTURE, ZYGOMA, OPEN                             |
| 08029000                       | FRACTURE, FACIAL BONE, NEC, LATE EFFECT            |
| 08029110                       | FRACTURE, PALATE, LATE EFFECT                      |
| 08029120                       | FRACTURE, ORBIT, LATE EFFECT                       |
| 08029130                       | FRACTURE, JAW, UPPER, LATE EFFECT                  |
| 08029131                       | FRACTURE, MAXILLA, LATE EFFECT                     |
| 08029132                       | FRACTURE, MAXILLARY ANTRUM, LATE EFFECT            |
| 08029141                       | FRACTURE, MALAR BONE, LATE EFFECT                  |
| 08029151                       | FRACTURE, FACIAL, LATE EFFECT                      |
| 08029152                       | FRACTURE, FACE BONE, LATE EFFECT                   |
| 08029160                       | FRACTURE, ZYGOMA, LATE EFFECT                      |
| 08029170                       | FRACTURE, NOSE, LATE EFFECT                        |
| 08029180                       | FRACTURE, MANDIBLE, LATE EFFECT                    |
| 08029181                       | FRACTURE, JAW, LOWER, LATE EFFECT                  |
| 08029190                       | FRACTURE, JAW, NOS, LATE EFFECT                    |
| 08029210                       | FRACTURE, PALATE, OLD                              |
| 08029220                       | FRACTURE, ORBIT, OLD                               |
| 08029230                       | FRACTURE, MAXILLA, OLD                             |
| 08029231                       | FRACTURE, JAW, UPPER, OLD                          |
| 08029240                       | FRACTURE, MALAR BONE, OLD                          |
| 08029250                       | FRACTURE, FACE BONE, OLD                           |
| 08029251                       | FRACTURE, FACIAL, OLD                              |
| 08029260                       | FRACTURE, ZYGOMA, OLD                              |
| 08029270                       | FRACTURE, NOSE, OLD                                |
| 08029280                       | FRACTURE, MANDIBLE, OLD                            |
| 08029281                       | FRACTURE, JAW, LOWER, OLD                          |
| 08029290                       | FRACTURE, JAW, NOS, OLD                            |
| 08030000                       | FRACTURE, SKULL, NEC, CLOSED                       |
| 08030110                       | FRACTURE, SKULL, NOS                               |
| 08031000                       | FRACTURE, SKULL, NEC, OPEN                         |
| 08031110                       | FRACTURE, SKULL, NOS, OPEN                         |
| 08039000                       | FRACTURE, SKULL, LATE EFFECT                       |
| 08039110                       | FRACTURE, SKULL, NOS, LATE EFFECT                  |
| 08039210                       | FRACTURE, SKULL, OLD                               |
| 08500000                       | CONCUSSION, CURRENT                                |
| 08500110                       | CONCUSSION, NOS                                    |
| 08500120                       | CONCUSSION, BRAIN, WITHOUT SKULL FRACTURE          |
| 08500130                       | COMMOTIO CEREBRI (WITHOUT SKULL FRACTURE)          |
| 08509000                       | CONCUSSION, LATE EFFECT                            |
| 08509110                       | ENCEPHALOPATHY, DUE TO TRAUMA                      |
| 08509111                       | ENCEPHALOPATHY, POST-TRAUMATIC                     |
| 08509112                       | PORENCEPHALY, POST-TRAUMATIC                       |
| 08509210                       | CONCUSSION, LATE EFFECT                            |
| 08509211                       | SYNDROME, CONCUSSION (LATE EFFECT)                 |
| 08510000                       | LACERATION, OR CONTUSION, CEREBRAL                 |
| 08510110                       | CONTUSION, BRAIN                                   |
| 08510111                       | CONTRA COUP (COUP CONTRA COUP)                     |
| 08510120                       | LACERATION, TENTORIUM CEREBELLI                    |
| 08510121                       | LACERATION, CORTEX, CEREBRAL                       |
| 08510122                       | LACERATION, CEREBRAL                               |
| 08510123                       | LACERATION, CEREBELLUM                             |
| 08510130                       | COMPRESSION, BRAIN, DUE TO LACERATION OR CONTUSION |
| 08511000                       | LACERATION, CEREBRAL, OPEN                         |
| 08511110                       | WOUND, BULLET, INTRACRANIAL                        |
| 08511111                       | WOUND, GUNSHOT, INTRACRANIAL                       |
| 08511120                       | CONTUSION, BRAIN, WITH OPEN INTRACRANIAL WOUND     |

(continued)

SUPPLEMENTARY TABLE S1. (CONTINUED)

| <i>Mayo adapted<br/>HICD-A</i> | <i>Code description</i>                                         |
|--------------------------------|-----------------------------------------------------------------|
| 08511121                       | WOUND, OPEN, BRAIN                                              |
| 08511122                       | LACERATION, CEREBRAL, WITH OPEN INTRACRANIAL WOUND              |
| 08519000                       | LACERATION, CEREBRAL, LATE EFFECT                               |
| 08519110                       | WOUND, OPEN, BRAIN, LATE EFFECT                                 |
| 08519120                       | CONTUSION, BRAIN, LATE EFFECT                                   |
| 08519130                       | LACERATION, CEREBRAL, LATE EFFECT                               |
| 08520000                       | HEMORRHAGE, SUBARACHNOID, SUBDURAL OR EXTRADURAL                |
| 08520110                       | HEMATOMA, SUBARACHNOID, TRAUMATIC                               |
| 08520111                       | HEMORRHAGE, SUBARACHNOID, TRAUMATIC                             |
| 08520120                       | HEMATOMA, SUBDURAL, TRAUMATIC                                   |
| 08520121                       | HEMORRHAGE, SUBDURAL, TRAUMATIC                                 |
| 08520122                       | HEMATOMA, EPIDURAL, TRAUMATIC                                   |
| 08521000                       | HEMORRHAGE, SUBARACHNOID, SUBDURAL OR EXTRADURAL, OPEN          |
| 08521110                       | HEMATOMA, SUBARACHNOID, TRAUMATIC                               |
| 08521111                       | HEMORRHAGE, SUBARACHNOID, TRAUMATIC                             |
| 08521120                       | HEMATOMA, SUBDURAL, TRAUMATIC                                   |
| 08521121                       | HEMORRHAGE, SUBDURAL, WITH OPEN INTRACRANIAL WOUND              |
| 08529000                       | HEMORRHAGE, SUBARACHNOID, SUBDURAL OR EXTRADURAL, LATE EFFECT   |
| 08529110                       | HEMORRHAGE, SUBARACHNOID, LATE EFFECT                           |
| 08529111                       | HEMATOMA, SUBARACHNOID, LATE EFFECT, TRAUMATIC                  |
| 08529112                       | HEMIPLEGIA, SUBARACHNOID, LATE EFFECT, HEMORRHAGE, TRAUMATIC    |
| 08529120                       | HEMORRHAGE, SUBDURAL, LATE EFFECT, TRAUMATIC                    |
| 08529121                       | HEMATOMA, SUBDURAL, LATE EFFECT, TRAUMATIC                      |
| 08529122                       | HEMIPLEGIA, SUBDURAL, LATE EFFECT, TRAUMATIC                    |
| 08529130                       | HEMATOMA, EXTRADURAL, LATE EFFECT, TRAUMATIC                    |
| 08529131                       | HEMORRHAGE, EXTRADURAL, LATE EFFECT, TRAUMATIC                  |
| 08529132                       | HEMIPLEGIA, ALTERNANS FACIA, EXTRADURAL, LATE EFFECT, TRAUMATIC |
| 08530000                       | HEMORRHAGE, INTRACRANIAL, NEC                                   |
| 08530110                       | COMPRESSION, BRAIN, DUE TO INJURY                               |
| 08530120                       | HEMORRHAGE, BRAIN, TRAUMATIC                                    |
| 08530121                       | HEMIPLEGIA, BRAIN, TRAUMATIC                                    |
| 08530122                       | HEMATOMA, BRAIN, TRAUMATIC                                      |
| 08531000                       | HEMORRHAGE, INTRACRANIAL, NEC, OPEN                             |
| 08531110                       | HEMIPLEGIA, BRAIN, WITH OPEN INTRACRANIAL WOUND                 |
| 08531111                       | HEMORRHAGE, BRAIN, WITH OPEN INTRACRANIAL WOUND                 |
| 08531112                       | HEMATOMA, BRAIN, WITH OPEN INTRACRANIAL WOUND                   |
| 08539000                       | HEMORRHAGE, INTRACRANIAL, NEC, LATE EFFECT                      |
| 08539110                       | HEMIPLEGIA, BRAIN, HEMORRHAGE, LATE EFFECT, TRAUMATIC           |
| 08539111                       | HEMORRHAGE, BRAIN, LATE EFFECT, TRAUMATIC                       |
| 08539112                       | HEMATOMA, BRAIN, LATE EFFECT, TRAUMATIC                         |
| 08540000                       | INJURY, INTRACRANIAL, NEC                                       |
| 08540110                       | INJURY, INTRACRANIAL, NOS                                       |
| 08540210                       | INJURY, HEAD, NEC, (INTRACRANIAL)-CHI                           |
| 08540220                       | SYNDROME, HEAD, TRAUMATIC                                       |
| 08540310                       | CONCUSSION, OSSEOUS LABYRINTH                                   |
| 08540311                       | CONCUSSION, LABYRINTH                                           |
| 08541000                       | INJURY, INTRACRANIAL, NEC, OPEN                                 |
| 08541110                       | INJURY, HEAD, NEC, (INTRACRANIAL), WITH OPEN INTRACRANIAL WOUND |
| 08541120                       | INJURY, INTRACRANIAL, WITH OPEN INTRACRANIAL WOUND              |
| 08541210                       | LACERATION, INTRACRANIAL                                        |
| 08541220                       | FOREIGN BODY, INTRACRANIAL                                      |
| 08541230                       | WOUND, OPEN, INTRACRANIAL                                       |
| 08549000                       | INJURY, INTRACRANIAL, NEC, LATE EFFECT                          |
| 08549110                       | IRRITATION, BRAIN, BY SCAR TISSUE                               |
| 08549120                       | EPILEPSY, TRAUMATIC                                             |
| 08549130                       | INJURY, HEAD, NEC, (INTRACRANIAL), LATE EFFECT                  |
| 08549131                       | POSTURING, DECEREBRATE, POST-TRAUMATIC                          |
| 08549140                       | INJURY, INTRACRANIAL, LATE EFFECT                               |
| 08690130                       | CONCUSSION, BLAST                                               |
| 08730000                       | LACERATION, SCALP                                               |
| 08730110                       | WOUND, OPEN, HEAD                                               |

(continued)

SUPPLEMENTARY TABLE S1. (CONTINUED)

| <i>Mayo adapted<br/>HICD-A</i> | <i>Code description</i>                                             |
|--------------------------------|---------------------------------------------------------------------|
| 08730120                       | INJURY, SCALP, NOS                                                  |
| 08730130                       | WOUND, OPEN, SCALP                                                  |
| 08730131                       | LACERATION, SCALP                                                   |
| 08731000                       | LACERATION, SCALP, COMPLICATED                                      |
| 08731110                       | WOUND, OPEN, HEAD, NEC, COMPLICATED                                 |
| 08731111                       | FOREIGN BODY, HEAD, NEC                                             |
| 08731120                       | INJURY, SCALP, COMPLICATED                                          |
| 08731130                       | WOUND, OPEN, SCALP, COMPLICATED                                     |
| 08731140                       | WOUND, OPEN, INFECTED, HEAD, CODE ALSO BY SITE, COMPLICATED         |
| 08737140                       | WOUND, OPEN, FOREHEAD                                               |
| 08738140                       | WOUND, OPEN, FOREHEAD, COMPLICATED                                  |
| 09002210                       | INJURY, HEAD, ARTERY, NEC                                           |
| 09002220                       | INJURY, HEAD, VEIN, NEC                                             |
| 09002230                       | ANEURYSM, HEAD, ARTERY, NEC, TRAUMATIC                              |
| 09003110                       | INJURY, HEAD, ARTERY, NOS                                           |
| 09003120                       | INJURY, HEAD, VEIN, NOS                                             |
| 09003130                       | ANEURYSM, HEAD, ARTERY, NOS, TRAUMATIC                              |
| 09003132                       | FISTULA, ARTERIOVENOUS, HEAD, TRAUMATIC                             |
| 09003141                       | HEMATOMA, ARTERIAL, HEAD, CODE ALSO INJURY, VASCULAR BY SITE        |
| 09100140                       | INJURY, SCALP, SUPERFICIAL, NOS                                     |
| 09100141                       | INJURY, HEAD, SUPERFICIAL                                           |
| 09101140                       | INJURY, SCALP, SUPERFICIAL, INFECTED                                |
| 09198000                       | INJURY, MULTIPLE, NOS                                               |
| 09198110                       | INJURY, MULTIPLE SITES, NEC                                         |
| 09198111                       | INJURY, NOS                                                         |
| 09198112                       | TRAUMA, NOS, SEE ALSO INJURY BY SITE                                |
| 09198113                       | AVULSION, NOS, SEE ALSO WOUND/INJURY TYPE SPECIFIED                 |
| 09198114                       | SWELLING, TRAUMATIC-SEE ALSO INJURY BY SITE                         |
| 09198120                       | INJURY, MULTIPLE SITES, NOS                                         |
| 09198130                       | HEMATOMA, SUBUNGUAL, NOS                                            |
| 09199111                       | SYNDROME, POST TRAUMATIC                                            |
| 09200160                       | CONTUSION, HEAD                                                     |
| 09200161                       | HEMATOMA, HEAD                                                      |
| 09200162                       | CONTUSION, FOREHEAD                                                 |
| 09200170                       | CONTUSION, SCALP                                                    |
| 09200171                       | CONTUSION, CAPITIS                                                  |
| 09200172                       | HEMATOMA, SCALP                                                     |
| 09200180                       | HEMATOMA, PERICRANIAL                                               |
| 09209110                       | HEMATOMA, PERICRANIAL, LATE EFFECT                                  |
| 09209113                       | HEMATOMA, CAPITIS, LATE EFFECT                                      |
| 09209117                       | HEMATOMA, SCALP, LATE EFFECT                                        |
| 09250110                       | HEMATOMA, SCALP, LATE EFFECT                                        |
| 09250111                       | CONTUSION, MULTIPLE SITES                                           |
| 09250112                       | ECCHYMOSIS, TRAUMATIC, NOS, SEE ALSO CONTUSION                      |
| <i>ICD-9-CM code</i>           | <i>Code description</i>                                             |
| 294.0                          | AMNESTIC SYNDROME                                                   |
| 310.0                          | FRONTAL LOBE SYNDROME                                               |
| 310.2                          | POSTCONCUSSION SYNDROME                                             |
| 432                            | OTHER AND UNSPECIFIED INTRACRANIAL HEMORRHAGE                       |
| 767.0                          | SUBDURAL AND CEREBRAL HEMORRHAGE DUE TO BIRTH TRAUMA                |
| 767.9                          | UNSPECIFIED BIRTH TRAUMA                                            |
| 780.0                          | ALTERATION OF CONSCIOUSNESS                                         |
| 800                            | FRACTURE OF VAULT OF SKULL                                          |
| 801                            | FRACTURE OF BASE OF SKULL                                           |
| 802                            | FRACTURE OF FACE BONES                                              |
| 803                            | OTHER AND UNQUALIFIED SKULL FRACTURES                               |
| 804                            | MULTIPLE FRACTURES INVOLVING SKULL OR FACE WITH OTHER BONES         |
| 850                            | CONCUSSION                                                          |
| 851                            | CEREBRAL LACERATION AND CONTUSION                                   |
| 852                            | SUBARACHNOID, SUBDURAL, AND EXTRADURAL HEMORRHAGE, FOLLOWING INJURY |

(continued)

SUPPLEMENTARY TABLE S1. (CONTINUED)

| <i>ICD-9-CM code</i> | <i>Code description</i>                                                                    |
|----------------------|--------------------------------------------------------------------------------------------|
| 853                  | OTHER AND UNSPECIFIED INTRACRANIAL HEMORRHAGE FOLLOWING INJURY                             |
| 854                  | INTRACRANIAL INJURY OF OTHER AND UNSPECIFIED NATURE                                        |
| 873.0                | OPEN WOUND OF SCALP, WITHOUT MENTION OF COMPLICATION                                       |
| 873.1                | OPEN WOUND OF SCALP, COMPLICATED                                                           |
| 873.42               | OPEN WOUND OF FOREHEAD, UNCOMPLICATED                                                      |
| 873.52               | OPEN WOUND OF FOREHEAD, COMPLICATED                                                        |
| 873.8                | OTHER AND UNSPECIFIED OPEN WOUND OF HEAD WITHOUT MENTION OF COMPLICATION                   |
| 900.9                | INJURY TO UNSPECIFIED BLOOD VESSEL OF HEAD AND NECK                                        |
| 905.0                | LATE EFFECT OF FRACTURE OF SKULL AND FACE BONES                                            |
| 906.0                | LATE EFFECT OF OPEN WOUND OF HEAD, NECK, AND TRUNK                                         |
| 906.3                | LATE EFFECT OF CONTUSION                                                                   |
| 907.0                | LATE EFFECT OF INTRACRANIAL INJURY WITHOUT MENTION OF SKULL FRACTURE                       |
| 908.6                | LATE EFFECT OF CERTAIN COMPLICATIONS OF TRAUMA                                             |
| 910.8                | OTHER AND UNSPECIFIED SUPERFICIAL INJURY OF FACE, NECK, AND SCALP, WO MENTION OF INFECTION |
| 910.9                | OTHER AND UNSPECIFIED SUPERFICIAL INJURY OF FACE, NECK, AND SCALP, INFECTED                |
| 920                  | CONTUSION OF FACE, SCALP, AND NECK EXCEPT EYE(S)                                           |
| 959.8                | OTHER AND UNSPECIFIED INJURY TO OTHER SPECIFIED SITES, INCLUDING MULTIPLE                  |
| 959.9                | OTHER AND UNSPECIFIED INJURY TO UNSPECIFIED SITE                                           |
